1 **Title:** Host infection dynamics and disease induced mortality modify species contributions to the  
2 environmental reservoir

3 Nichole A. Laggan<sup>1\*</sup>, Katy L. Parise<sup>2</sup>, J. Paul White<sup>3</sup>, Heather M. Kaarakka<sup>3</sup>, Jennifer A. Redell<sup>3</sup>,  
4 John E. DePue<sup>4</sup>, William H. Scullon<sup>5</sup>, Joseph Kath<sup>6</sup>, Jeffrey T. Foster<sup>2</sup>, A. Marm Kilpatrick<sup>7</sup>,  
5 Kate E. Langwig<sup>1</sup>, Joseph R. Hoyt<sup>1</sup>

6 <sup>1</sup>Department of Biological Sciences, Virginia Polytechnic Institute, Blacksburg, VA, 24060 USA

7 <sup>2</sup>Pathogen and Microbiome Institute, Northern Arizona University, Flagstaff, AZ, 86011, USA

8 <sup>3</sup>Wisconsin Department of Natural Resources, Madison, WI, 53707, USA

9 <sup>4</sup>Michigan Department of Natural Resources, Baraga, MI 49870, USA

10 <sup>5</sup>Michigan Department of Natural Resources, Norway, MI 49908, USA

11 <sup>6</sup>Illinois Department of Natural Resources, Springfield, IL, 62702, USA

12 <sup>7</sup>Department of Ecology and Evolutionary Biology, University of California, Santa Cruz, CA,  
13 95064, USA

14 **\*Correspondence to:** Nichole A. Laggan: [nicholelaggan@gmail.com](mailto:nicholelaggan@gmail.com)

15 **Open Research statement:** All data are available in Dryad (Laggan et al. 2023)

16 <https://doi.org/10.5061/dryad.ns1rn8pzz>.

17 **Key words:** emerging infectious disease, environmental pathogen reservoir, pathogen shedding,  
18 host infectiousness, environmental transmission, white-nose syndrome

19

20 **Abstract**

21 Environmental pathogen reservoirs exist for many globally important diseases and can fuel  
22 epidemics, influence pathogen evolution, and increase the threat of host extinction. Species  
23 composition can be an important factor that shapes reservoir dynamics and ultimately determines  
24 the outcome of a disease outbreak. However, disease induced mortality can change species  
25 communities, indicating that species responsible for environmental reservoir maintenance may  
26 change over time. Here we examine reservoir dynamics of *Pseudogymnoascus destructans*, the  
27 fungal pathogen that causes white-nose syndrome in bats. We quantified changes in pathogen  
28 shedding, infection prevalence and intensity, host abundance, and the subsequent propagule  
29 pressure imposed by each species over time. We find that highly shedding species are important  
30 during pathogen invasion, but contribute less over time to environmental contamination as they  
31 also suffer the greatest declines. Less infected species remain more abundant, resulting in  
32 equivalent or higher propagule pressure. More broadly, we demonstrate that high infection  
33 intensity and subsequent mortality during disease progression can reduce the contributions of  
34 high shedding species to long-term pathogen maintenance.

## 35 **Introduction**

36 Emerging infectious diseases threaten efforts to conserve global biodiversity (Daszak et  
37 al. 2000, Taylor et al. 2001, Jones et al. 2008, Fisher et al. 2012). In some disease systems,  
38 pathogens may survive for long periods of time in the environment in the absence of a living host  
39 (Turner et al. 2016, Plummer et al. 2018, Islam et al. 2020). Pathogen persistence in the  
40 environment allows for transmission independent of infected hosts, can exacerbate disease  
41 impacts, and increase the risk of host extinction (de Castro and Bolker 2005, Mitchell et al. 2008,  
42 Almberg et al. 2011, Hoyt et al. 2020). However, pathogen contamination in the environment is  
43 not homogenous; rather, variation in the amount of pathogen in the environmental reservoir is  
44 likely driven by a complex process of pathogen shedding from hosts within the community  
45 leading to subsequent transmission events.

46 Infected hosts can vary in the amount of pathogen they shed into the environment with  
47 some hosts producing disproportionately high amounts of pathogen, independent of direct host  
48 contacts (Sheth et al. 2006, Chase-Topping et al. 2008, Lawley et al. 2008, Direnzo et al. 2014).  
49 Research has shown that variation in host shedding can be driven by differences in behavior  
50 (Godfrey 2013, Rushmore et al. 2013, VanderWaal and Ezenwa 2016), innate susceptibility  
51 (Searle et al. 2011, Gervasi et al. 2013), space use (Brooks-Pollock et al. 2014), and infection  
52 severity (Lloyd-Smith et al. 2005, Munywoki et al. 2015). In multi-host disease systems,  
53 variation in pathogen shedding, produced through community composition and species  
54 abundance, can play a key role in transmission dynamics (Kilpatrick et al. 2006, Esteban et al.  
55 2009, Paull et al. 2012).

56 Host abundance within a community can interact with host shedding to moderate  
57 transmission from a particular species (Lloyd-Smith et al. 2005, Paull et al. 2012, Kilonzo et al.

58 2013). Species that have low rates of shedding, but are highly abundant, may contribute more to  
59 transmission than might be expected based on the per capita amount of pathogen they shed  
60 (Peterson and McKenzie 2014, Scheele et al. 2017). Conversely, a species that has high rates of  
61 shedding or is highly infectious, but at low abundance, may contribute less to transmission than  
62 other species (Lloyd-Smith et al. 2005, Kilpatrick et al. 2006). In addition, for some wildlife  
63 infectious diseases, infectiousness, shedding, and impacts are positively correlated (Langwig et  
64 al. 2016, Brannelly et al. 2020), such that hosts initially important for disease transmission,  
65 suffer from high disease-related mortality and become less important contributors to pathogen  
66 maintenance over time (Brannelly et al. 2018). Variation in pathogen shedding and how it  
67 influences disease dynamics is important for many disease systems (Sheth et al. 2006, Chase-  
68 Topping et al. 2008, Henaux and Samuel 2011, Brooks-Pollock et al. 2014, Direnzo et al. 2014,  
69 Slater et al. 2016), but how differences in host shedding scale to a community-level and  
70 influence the environmental reservoir are rarely linked together.

71         White-nose syndrome (WNS) is an emerging infectious disease caused by the fungal  
72 pathogen *Pseudogymnoascus destructans* (Lorch et al. 2011, Warnecke et al. 2012), that has had  
73 devastating effects on bat populations (Langwig et al. 2012, Frick et al. 2015, Langwig et al.  
74 2016). White-nose syndrome exhibits seasonal infection dynamics that are driven by the  
75 environmental reservoir and host-pathogen ecology (Langwig et al. 2015a, Hoyt et al. 2021,  
76 Langwig et al. 2021, Kailing et al. 2023). *Pseudogymnoascus destructans* can persist for long  
77 periods of time in the environment, which results in widespread infection when hosts return to  
78 hibernacula (subterranean sites where bats hibernate in the winter) in the fall (Lorch et al. 2013,  
79 Hoyt et al. 2015, Langwig et al. 2015a, Campbell et al. 2019, Hoyt et al. 2020, Hicks et al.  
80 2021). During this time, susceptible bats become infected or reinfected by *P. destructans* when

81 they come into contact with the environmental reservoir upon entering hibernacula (Langwig et  
82 al. 2015a). Over the winter hibernation period, *P. destructans* grows into the skin tissue, causing  
83 deleterious physiological changes, including increased arousals from hibernation, weight loss,  
84 dehydration, and often death (cumulative 95-99% declines) (Warnecke et al. 2013, Verant et al.  
85 2014, McGuire et al. 2017, Hoyt et al. 2021). During hibernation, susceptible bat species vary  
86 greatly in their infection intensities and three species have suffered declines that exceed 95%  
87 (Langwig et al. 2012, Langwig et al. 2016, Hoyt et al. 2020, Hoyt et al. 2021). Species  
88 abundance also varies greatly within bat communities and during the epizootic (Langwig et al.  
89 2012, Frick et al. 2015). Together, differences in pathogen shedding and species abundance may  
90 influence pathogen contamination in the environment.

91         The amount of *P. destructans* in the environment has been shown to increase after the  
92 first year of invasion (Hoyt et al. 2020) and contamination of the environmental reservoir has  
93 been linked to increased pathogen prevalence and loads for bats (Hoyt et al. 2020, Hoyt et al.  
94 2021). As a result, bat mortality also increases with higher levels of environmental  
95 contamination (Hoyt et al. 2018, Hoyt et al. 2020, Hicks et al. 2021, Hoyt et al. 2023). However,  
96 the establishment of the environmental pathogen reservoir in these multi-host communities  
97 remains an important knowledge gap.

98         Environmental transmission is an important driver of infectious disease dynamics and  
99 understanding the factors that lead to pathogen establishment in the environment is crucial for  
100 disease control and prevention. Here we use a unique dataset that encompasses the stages of *P.*  
101 *destructans* invasion and establishment to capture pathogen accumulation in the environmental  
102 reservoir across 19 sites in the Midwestern United States. Using these data, we explored potential  
103 differences in pathogen shedding among species. We also assessed the relationship between bat

104 infection intensity and the amount of pathogen shed into the environment by each species present  
105 in the community. We hypothesized that bat species abundance would also play a key role in  
106 site-level contamination and environmental reservoir establishment, so we also explored how  
107 differential pathogen shedding among species and their abundance influences the propagule  
108 pressure within communities.

109

## 110 **Methods**

### 111 *Sample collection and quantification*

112 We quantified *P. destructans* fungal loads on bats and from hibernacula substrate  
113 throughout bat hibernation sites in the Midwestern, United States. Samples were collected from  
114 19 sites in Wisconsin, Illinois, and Michigan and each site included three years of pathogen data  
115 from invasion to establishment, which was collected over a seven-year period (Appendix S1:  
116 Table S1). Hibernacula were visited twice yearly, once during early hibernation (November to  
117 December) and once during late hibernation (March to April) to capture differences in infection  
118 dynamics and environmental contamination at the beginning and end of hibernation. During each  
119 visit, we counted the total number of bats within each site by species (*Eptesicus fuscus* (Big  
120 brown bat), *Myotis lucifugus* (Little brown bat), *Myotis septentrionalis* (Northern long-eared bat)  
121 and *Perimyotis subflavus* (Tricolored bat)) (Appendix S1: Figure S1). We collected epidermal  
122 swab samples from bats within sites to quantify bat infection intensity (quantities of fungal  
123 DNA) and determine infection prevalence (Appendix S1: Table S2). Samples were collected  
124 using previously established protocols that consisted of rubbing a polyester swab dipped in  
125 sterile water over the muzzle and forearm of the bat five times (Langwig et al. 2015a, Hoyt et al.  
126 2016).

127 To measure the amount of *P. destructans* shed into the environment we also collected  
128 environmental substrate swabs from beneath or directly adjacent to each hibernating bat (on  
129 hibernacula walls and ceilings) where they are in direct contact with the substrate. Samples  
130 collected in close proximity to bats have shown to be strongly tied to the infection intensity of  
131 the bat (Langwig et al. 2015b, Hoyt et al. 2020). To capture independent site-level *P. destructans*  
132 environmental contamination, we collected swab samples as described above, but collected from  
133 the environment in locations more than two meters away from roosting bats, in areas where bats  
134 might roost. These samples were used to estimate the reservoir contamination across the site  
135 without targeting substrate used by specific bat species. These environmental samples were taken  
136 by swabbing an area of substrate equal to the length of a bat's forearm (36-40 mm) five times  
137 back and forth, as described previously (Langwig et al. 2015b). We preserved *P. destructans*  
138 DNA samples by storing all swabs in salt preservation buffer (RNAlater; Thermo Fisher  
139 Scientific) directly after collection. DNA was extracted from all samples with a modified Qiagen  
140 DNeasy Blood & Tissue Kit (Frick et al. 2015, Langwig et al. 2015b). The presence and quantity  
141 of *P. destructans* was determined by quantitative Polymerase Chain Reaction (qPCR) (Muller et  
142 al. 2013).

143 To verify that fungal loads measured using qPCR accurately reflected viable fungal  
144 spores in the environment, that are able to infect a host, we collected additional substrate swab  
145 samples from a subset of locations that were paired with substrate swabs used for qPCR. These  
146 samples were cultured by streaking the substrate swab across a plate containing Sabouraud  
147 Dextrose Agar treated with chloramphenicol and gentamicin. The plates were stored at 4 °C and  
148 colony forming units (CFU's) of *P. destructans* were quantified within six weeks of initial  
149 inoculation. We paired substrate samples analyzed using qPCR to determine  $\log_{10}$  *P. destructans*

150 loads for comparison with colony forming units obtained from culture samples to validate  
151 viability. There was a significant relationship between quantity of *P. destructans* DNA measured  
152 through qPCR and the number of CFU's (Appendix S1: Figure S2). This suggests that qPCR was  
153 a valid method to estimate the amount of *P. destructans* in the environment and supports that  
154 qPCR results are reflective of the number of infectious propagules in the environment and not  
155 relic DNA (Appendix S1: Figure S2).

156 All research was approved through Institutional Animal Care and Use Committee  
157 protocols: Virginia Polytechnic Institute: 17-180; University of California, Santa Cruz:  
158 Kilpm1705; Wisconsin Endangered/Threatened Species Permit 882 & 886; Michigan  
159 Department of Natural Resources permit SC-1651; Illinois Endangered/ Threatened Species  
160 Permit 5015, 2582 and Scientific Collections permit NH20.5888; US Fish and Wildlife Service  
161 Threatened & Endangered Species Permit TE64081B-1.

#### 162 *Data analysis*

163 We separated invasion stage into two distinct categories: “invasion” which included the  
164 first year the pathogen arrived, as described previously (Langwig et al. 2015b, Hoyt et al. 2020),  
165 and “establishment” which included the second and third years of *P. destructans* presence in a  
166 site when bat species declines begin to occur, which corresponds to the epidemic stage as has  
167 been previously noted (Langwig et al. 2015b, Hoyt et al. 2020). We used these stages to capture  
168 pathogen shedding into the environment before and after pathogen accumulation in the  
169 environment occurred (invasion and establishment, respectively) and to examine the dynamic  
170 changes between stages of pathogen invasion and establishment.

171 We first examined the presence and quantity of *P. destructans* on each bat species and the  
172 amount each bat species shed into the environment. We used mixed effects models with  $\log_{10}$



173 environmental fungal load collected under each bat as our response variable, bat species as our  
174 predictor, and site as a random effect for both invasion stages. Tables are reported for model  
175 output by including *M. septentrionalis* as the reference level for the invasion stage and *M.*  
176 *lucifugus* during the established stage. These were chosen because they had the highest levels of  
177 shedding in the respective stages and demonstrate contrasts to all other species. We similarly  
178 compared infection intensity among species using the same model as described above, but with  
179  $\log_{10}$  fungal loads on bats as the response variable. For this analysis we reported the table for the  
180 model output with *E. fuscus* as the reference level because it has the lowest levels of infection  
181 intensity and demonstrates contrasts to the other species. We examined differences in infection  
182 prevalence by bat species using a generalized linear mixed effects model with a binomial  
183 distribution and a logit link with species as our predictor, bat infection status (0|1) as our  
184 response, and site as a random effect. To examine within host variation in pathogen shedding, we  
185 calculated the coefficient of variation of pathogen shedding for each species in both invasion  
186 stages.

187         To examine how differences in bat infection intensity contributed to contamination of the  
188 environment under each individual, we used a linear mixed effects model to explore the  
189 relationship between infection intensity of each bat and the amount of pathogen shed into the  
190 environment under each individual. In this analysis, we used paired  $\log_{10}$  environmental *P.*  
191 *destructans* loads under a bat as our response variable with  $\log_{10}$  bat fungal loads interacting with  
192 species as our predictor and site as a random effect. We combined the invasion and established  
193 stages since the amount of pathogen shed into the environment was hypothesized to be a product  
194 of how infected the host was, and therefore, comparable across years. We report the output of  
195 our model by using estimated marginal means of linear trends to highlight the support for the

196 relationship between bat fungal loads and environmental fungal loads beneath bats for all species  
197 and to display multiple species slope contrasts. To examine within host variation in infection  
198 intensity, we calculated the coefficient of variation for infection intensity for each species in both  
199 invasion stages.

200 We investigated the role of bat species abundance on environmental contamination of *P.*  
201 *destructans*. We first examined the differences among species abundance within sites for each  
202 invasion stage by using a linear mixed effects model with species as our predictor and  $\log_{10}$   
203 population count during early hibernation (before over-winter declines occur) as our response  
204 and included site as a random effect. To explore how species abundance influenced the degree of  
205 pathogen contamination within sites, we used a linear mixed effects model with  $\log_{10}$   
206 environmental fungal loads collected greater than two meters from any bat during late  
207 hibernation as our response variable and  $\log_{10}$  average population abundance between established  
208 years interacting with species identity as our predictors with site as a random effect.

209 Finally, we calculated differences in propagule pressure among bat species by  
210 multiplying pathogen prevalence by bat species abundance within each site to get the number of  
211 infected individuals. We then multiplied the number of infected individuals by the average  
212 amount of fungal spores shed into the environment by each species in each site. We analyzed the  
213 propagule pressure calculations using a generalized linear mixed effects model with a negative  
214 binomial distribution to account for dispersed population abundance counts with an interaction  
215 between species as our predictor and propagule pressure as our response for each invasion stage.  
216 We performed this analysis for invasion (year 0) and establishment (years 1-2) during late  
217 hibernation to investigate how pathogen pressure may differ across stages of pathogen invasion  
218 when bats are heavily shedding into the environment. For the invasion year, we report the table

219 for model output with *M. septentrionalis* as the reference level as it has the highest level of  
220 propagule pressure compared to the other species. For the established stage we report using  
221 estimated marginal means of our generalized linear mixed effects model to highlight contrasts  
222 between multiple species. To assess if propagule pressure was a suitable metric for pathogen  
223 invasion of the environmental reservoir, we examined the relationship between site-level  
224 environmental contamination, as described above, and sum propagule pressure for each site  
225 using a linear mixed effects model with site included as a random effect.

226 All analyses were conducted in R v.4.2.1 (R Core Team 2022). Mixed-effects models  
227 were run using the package “lme4” (Bates et al. 2015) except for analyses using a negative  
228 binomial distribution which were ran using “glmmTMB” (Brooks et al. 2017). The reported  
229 estimated marginal means and estimated marginal means of linear trends were generated using  
230 the package “emmeans” (Searle et al. 1980, Lenth 2022).

231

## 232 **Results**

233 We found that pathogen shedding (the amount of pathogen detected under bats) and  
234 infection varied both within and among the four species present in the community (Figure 1,  
235 Appendix S1: Figure S3). During initial pathogen invasion into bat communities, we found that  
236 on average, individual *M. septentrionalis* (Figure 1A; Appendix S1: Table S4; intercept =  $-3.72 \pm$   
237  $0.33$ ) contributed more pathogen into the environment than *E. fuscus* (coeff =  $-0.88 \pm 0.33$ , P =  
238  $0.009$ ), *M. lucifugus* (coeff =  $-0.52 \pm 0.22$ , P =  $0.02$ ), and *P. subflavus* (coeff =  $-0.86 \pm 0.35$ , P =  
239  $0.02$ ), and also had the greatest within species variability (Appendix S1: Figure S3A). In the  
240 established stage (Figure 1B; Appendix S1: Table S5), we found support for shifts in species  
241 shedding patterns with higher shedding in *M. lucifugus* (intercept =  $-3.41 \pm 0.12$ ) than *E. fuscus*

242 (coeff =  $-0.75 \pm 0.14$ ,  $P < 0.0001$ ) and *P. subflavus* (coeff =  $-0.65 \pm 0.13$ ,  $P < 0.0001$ ), but similar  
243 shedding to *M. septentrionalis* (coeff =  $-0.33 \pm 0.24$ ,  $P = 0.17$ ).

244 Our results showed consistent support that host infection intensity predicted the amount  
245 of pathogen shed into the environment for all species (Figure 2C; Appendix S1: Table S8; host  
246 infection and shedding relationship: *M. lucifugus* slope =  $0.38 \pm 0.05$ ,  $P < 0.0001$ ; *E. fuscus* slope  
247 =  $0.33 \pm 0.07$ ,  $P < 0.0001$ ; *M. septentrionalis* slope =  $0.41 \pm 0.10$ ,  $P < 0.0001$ ; *P. subflavus* slope  
248 =  $0.33 \pm 0.08$ ,  $P = 0.0001$ ). Importantly, we found no support for differences among species in  
249 the slope between environmental pathogen shedding and host infection intensity (Figure 2C;  
250 Appendix S1: Table S8; all  $P > 0.05$ ), suggesting that differences in shedding were primarily  
251 driven by the infection intensity of individual bats. *Eptesicus fuscus* (intercept =  $-3.37 \pm 0.16$ )  
252 had significantly lower infection intensity than all other species within the community (Figure  
253 2B; Appendix S1: Table S7; *M. lucifugus* coeff =  $1.38 \pm 0.15$ ,  $P < 0.0001$ ; *M. septentrionalis*  
254 coeff =  $1.08 \pm 0.21$ ,  $P < 0.0001$ ; *P. subflavus* coeff =  $1.30 \pm 0.17$ ,  $P < 0.0001$ ), but had the  
255 greatest amount of variation for within species infection intensity (Appendix S1: Figure S3B). In  
256 addition, we found that *M. lucifugus* (intercept =  $2.19 \pm 0.27$ ) had the highest infection  
257 prevalence, with 87% of hosts infected on average across the invasion and established stages  
258 (Figure 2A; Appendix S1: Table S6; *E. fuscus* coeff =  $-0.79 \pm 0.31$ ,  $P < 0.01$ ; *M. septentrionalis*  
259 coeff =  $-0.83 \pm 0.35$ ,  $P = 0.02$ ; *P. subflavus* coeff =  $-1.10 \pm 0.24$ ,  $P < 0.0001$ ).

260 In addition to differences in infection intensity and prevalence, species also varied in  
261 abundance, with *M. lucifugus* (intercept =  $1.63 \pm 0.19$ ) being the most abundant species across  
262 sites, with an average population size of  $39.81 \pm 7.76$  before declines from WNS (invasion)  
263 (Figure 3; Appendix S1: Table S9; *E. fuscus* coeff =  $-0.65 \pm 0.24$ ,  $P < 0.01$ ; *M. septentrionalis*  
264 coeff =  $-0.60 \pm 0.21$ ,  $P < 0.01$ ; *P. subflavus* coeff =  $-0.41 \pm 0.23$ ,  $P < 0.08$ ). During the

265 established stage, while population declines were occurring, *M. lucifugus* (intercept =  $1.28 \pm$   
266  $0.13$ ) remained the most abundant species within the community with an average population size  
267 of  $18.20 \pm 7.41$  (Figure 3; Appendix S1: Table S10; *E. fuscus* coeff =  $-0.54 \pm 0.16$ ,  $P < 0.001$ ; *M.*  
268 *septentrionalis* coeff =  $-0.76 \pm 0.14$ ,  $P < 0.0001$ ; *P. subflavus* coeff =  $-0.38 \pm 0.15$ ,  $P < 0.01$ ). *M.*  
269 *septentrionalis* had the lowest abundance in the community with an average colony size of  $11.22$   
270  $\pm 5.50$  individuals before disease impacts and declined to an average of  $3.52 \pm 4.12$  individuals  
271 in a site during the established stage (Figure 3; Appendix S1: Table S9; Appendix S1: Table  
272 S10). Furthermore, host abundance was important in influencing the degree of site-level  
273 environmental pathogen contamination (Appendix S1: Figure S4; Appendix S1: Table S13; *M.*  
274 *lucifugus* slope =  $0.25 \pm 0.11$ ,  $P = 0.03$ ).

275 Finally, when we combined infection prevalence, species abundance, and pathogen  
276 shedding into the metric of propagule pressure, we found that during the first year of invasion,  
277 *M. septentrionalis* (Figure 4A; Appendix S1: Table S11; intercept =  $7.44 \pm 1.05$ ) had higher  
278 propagule pressure than *P. subflavus* (coeff =  $-3.17 \pm 1.25$ ,  $P = 0.01$ ) and *E. fuscus* ( $-4.28 \pm 1.21$ ,  
279  $P < 0.001$ ), but not *M. lucifugus* (coeff =  $0.87 \pm 1.03$ ,  $P = 0.39$ ). In years following invasion,  
280 once *P. destructans* was established, *M. lucifugus* (Figure 4B; Appendix S1: Table S12; coeff  
281 from estimated marginal mean =  $10.75 \pm 0.51$ ) had consistently higher propagule pressure and  
282 contributed more pathogen to the environmental reservoir than all other species (Figure 4B;  
283 Appendix S1: Table S12; *M. lucifugus*-*M. septentrionalis* contrast =  $4.24 \pm 0.79$ ,  $P < 0.001$ ; *M.*  
284 *lucifugus*-*E. fuscus* contrast =  $3.84 \pm 0.56$ ,  $P < 0.0001$ ; *M. lucifugus*-*P. subflavus* contrast =  $2.46$   
285  $\pm 0.54$ ,  $P = 0.0001$ ). *Myotis septentrionalis* (Figure 4B; Appendix S1: Table S12; coeff from  
286 estimated marginal mean =  $6.52 \pm 0.81$ ) no longer contributed more than *P. subflavus* (*M.*  
287 *septentrionalis*-*P. subflavus* contrast =  $-1.78 \pm 0.85$ ,  $P = 0.16$ ) or *E. fuscus* (*M. septentrionalis*-*E.*

288 *fuscus* contrast =  $-0.39 \pm 0.83$ ,  $P = 0.97$ ) due to their rarity following disease-induced declines  
289 (Figure 4). Mean environmental contamination in areas greater than two meters from bats  
290 increased with total propagule pressure calculated at a site level (summed propagule pressure  
291 among species), suggesting the measure of propagule pressure accurately captures environmental  
292 contamination levels (Figure 4C; relationship between environmental contamination and  
293 propagule pressure intercept =  $-5.48 \pm 0.14$ , slope = 0.12,  $P = 0.002$ ).

294

## 295 ***Discussion***

296 Variation in pathogen shedding, and subsequent environmental transmission can have  
297 dramatic impacts on community-level disease outcomes. Our findings demonstrate how  
298 increases in host infection intensity can lead to increased pathogen shedding of *P. destructans*  
299 (Figure 2C), which is consistent with research in other systems (Lloyd-Smith et al. 2005,  
300 Matthews et al. 2006, Chase-Topping et al. 2008, Direnzo et al. 2014, Munywoki et al. 2015,  
301 Maguire et al. 2016, VanderWaal and Ezenwa 2016). In addition, we demonstrate that changes in  
302 host abundance and differences in infection prevalence modify species contributions to the  
303 environmental reservoir, which varied over time (Figure 2A; Figure 3; Figure 4). Most  
304 importantly, while high infection intensity initially leads to high pathogen shedding for one  
305 species (Figure 2C), this also leads to elevated mortality (Langwig et al. 2016) and local  
306 extirpations (Appendix S1: Figure S1). In contrast, species with lower infection intensity and  
307 greater variation within species for infection intensity, such as *E. fuscus*, had reduced impacts  
308 (Figure 2B; Appendix S1: Figure S1; Appendix S1: Figure S3B) (Langwig et al. 2016) and may  
309 be more important in pathogen maintenance than high shedding species that suffer severe  
310 mortality. Therefore, we identified a shift in the species responsible for the greatest

311 environmental reservoir contamination between invasion stages, suggesting that contributions to  
312 the reservoir is a dynamic process that varies over time (Figure 4).

313         The relationship between individual host shedding into the environment and host  
314 infection intensity did not differ among species, suggesting that individuals of different species  
315 with the same infection intensity are equally efficient at depositing pathogen into the  
316 environment (Figure 2C; Appendix S1: Figure S5). Instead, the prevalence and intensity of  
317 infection, which did vary among species, influenced how much pathogen was shed on average  
318 per individual (Figure 2A; Figure 2B; Figure 2C). Some species such as *E. fuscus* had low-  
319 intensity infections despite moderate prevalence, while other species, *M. septentrionalis* and *M.*  
320 *lucifugus*, were much more heavily infected and shed more pathogen into the environment  
321 (Figure 2B; Figure 2C). In addition, we saw shifts in host infection intensity between invasion  
322 and establishment stages (Figure 2B) leading to shifts in shedding (Figure 1A; Figure 1B). An  
323 increase in host infection prevalence between invasion stages has been previously described by  
324 Hoyt et al. 2020, where increases in pathogen contamination during the initial invasion stage,  
325 results in rapid reinfection and higher exposure doses in subsequent years. This influenced fungal  
326 burdens on bats and eventually population level declines (Langwig et al. 2015b, Hoyt et al. 2020,  
327 Langwig et al. 2021).

328         Disease-caused declines in several bat species (Figure 3), which has been shown to be  
329 strongly linked with intensity of infection (Langwig et al. 2017, Hopkins et al. 2021), resulted in  
330 large changes in species abundance and community composition (Appendix S1: Figure S1). We  
331 found support that species abundance predicted site-level contamination (Appendix S1: Figure  
332 S4), and this reinforced the need to account for abundance when determining species-level  
333 contributions to the environmental reservoir. To combine these factors, we used propagule

334 pressure or “introduction effort”, which is a fundamental ecological metric that determines  
335 whether a biological invasion will be successful in reaching establishment (Lockwood et al.  
336 2005), and is especially applicable to emerging infectious diseases. We found that environmental  
337 contamination in the sampled locations that were not associated with an individual bat increased  
338 as our calculated propagule pressure metric increased (Figure 4C), suggesting that propagule  
339 pressure is an accurate way of measuring species contributions to the environmental reservoir.

340         During the initial invasion of *P. destructans*, both *M. lucifugus* and *M. septentrionalis*  
341 had higher propagule pressure than other species present (Figure 4A), which was not apparent  
342 through examination of only pathogen shedding (Figure 1A). The high infection intensity of *M.*  
343 *septentrionalis* resulted in a large contribution to the initial establishment of the environmental  
344 reservoir despite their low relative abundance (Figure 2B; Figure 3). However, in subsequent  
345 years, as this species declined precipitously (Figure 3; Appendix S1: Figure S1), their  
346 contribution was greatly reduced and equivalent to less infected species (e.g. *E. fuscus*, Figure  
347 4B).

348         Our results suggest that host abundance, infection prevalence, and infection intensity  
349 (which influences shedding into the environment) are collectively required to describe species  
350 contributions to environmental pathogen contamination. For example, while *E. fuscus*, *M.*  
351 *septentrionalis*, and *P. subflavus* eventually contributed similar propagule pressures during the  
352 established invasion stage (Figure 4B), this was likely driven by different factors that need to be  
353 considered when evaluating their influence on environmental contamination. *Eptesicus fuscus*  
354 had low infection intensity and subsequently low declines, but had moderate pathogen  
355 prevalence (Figure 2A; Figure 2B) and moderate abundance (Figure 3), which elevated its  
356 contribution. *Perimyotis subflavus* had high infection intensity, but reduced prevalence compared



357 to the other heavily infected species (Figure 2A; Figure 2B) and was only present in moderate  
358 abundances (Figure 3). Finally, *M. septentrionalis* was heavily infected (Figure 2B), but at low  
359 abundance across communities (Figure 3), which reduced its overall importance in years  
360 following initial pathogen invasion (Figure 4B). *Myotis lucifugus* maintained high propagule  
361 pressure through the invasion and establishment of *P. destructans* (Figure 4A; Figure 4B),  
362 suggesting that the presence of *M. lucifugus* within a community will result in rapid  
363 establishment of *P. destructans* in the environment, and maintenance of environmental  
364 contamination within a site over time (Appendix S1: Figure S4). We also found that within-  
365 species variation in infection and pathogen shedding changed across invasion stages by species  
366 (Appendix S1: Figure S3) which may be influenced by numerous factors (e.g. timing of  
367 infection, microclimate use, etc.) and warrants further investigation. Our results highlight  
368 numerous factors that must be considered to evaluate the influence of pathogen shedding on  
369 environmental reservoir maintenance, subsequent environmental transmission, and how this can  
370 change dynamically across invasion stages.

371         Understanding environmental reservoir dynamics is crucial for many globally important  
372 disease systems. Discerning how variation across species contributes to maintenance of the  
373 environmental reservoir is important in determining the extent of epidemics, predicting long-  
374 term impacts on host communities, and developing control strategies. We demonstrate that the  
375 establishment and maintenance of the environmental reservoir is strongly influenced by variation  
376 in pathogen prevalence, infection intensity, and species abundance. Evaluating these effects  
377 together through the metric of propagule pressure allowed us to capture which species within the  
378 community contributed to pathogen invasion success and ultimately the maintenance of indirect  
379 transmission, which is an important driver of infection and mortality (Hoyt et al. 2018). Broadly,

380 our results demonstrate that multiple factors of species variability can scale to influence  
381 environmental reservoir dynamics within communities.

382

383 **Acknowledgements:**

384 The research was funded by the joint NSF-NIH-NIFA Ecology and Evolution of Infectious  
385 Disease award DEB-1911853, NSF DEB-1115895, USFWS (F17AP00591), and by the NSF  
386 GRFP. We would like to acknowledge E. McMaster, and the numerous other landowners for  
387 access to sites, M.J. Kailing for assistance with culture collection and B. Heeringa and D. Kirk  
388 for field assistance.

389

390 **Conflict of Interest:** The authors declare no conflicts of interest

391

392 **Author Contributions:**

393 NAL and JRH wrote the original draft of the manuscript. JRH, KEL, and AMK designed  
394 methodology; NAL, JRH, KEL, AMK, JPW, HMK, JAR, JED, WHS, and JK collected the data;  
395 NAL conducted the laboratory experiment; JTF and KLP supervised and performed sample  
396 testing; NAL analyzed the data with assistance from KEL and JRH; All authors contributed  
397 critically to draft revision.

398 **References**

- 399 Almberg, E. S., P. C. Cross, C. J. Johnson, D. M. Heisey, and B. J. Richards. 2011. Modeling  
400 routes of chronic wasting disease transmission: environmental prion persistence promotes deer  
401 population decline and extinction. *PloS one* **6**:e19896.
- 402 Bates, D., M. Mächler, B. M. Bolker, and S. C. Walker. 2015. Fitting linear mixed-effects  
403 models using lme4. *Journal of Statistical Software* **67**:1-48.
- 404 Brannelly, L. A., H. I. McCallum, L. F. Grogan, C. J. Briggs, M. P. Ribas, M. Hollanders, T.  
405 Sasso, M. Familiar López, D. A. Newell, and A. M. Kilpatrick. 2020. Mechanisms  
406 underlying host persistence following amphibian disease emergence determine  
407 appropriate management strategies. *Ecology Letters*.
- 408 Brannelly, L. A., R. J. Webb, D. A. Hunter, N. Clemann, K. Howard, L. F. Skerratt, L. Berger,  
409 and B. C. Scheele. 2018. Non-declining amphibians can be important reservoir hosts for  
410 amphibian chytrid fungus. *Animal Conservation* **21**:87-180.
- 411 Brooks, M. E., K. Kristensen, K. J. van Benthem, A. Magnusson, C. W. Berg, A. Nielson, H. J.  
412 Skaug, M. Maechler, and B. M. Bolker. 2017. glmmTMB Balances Speed and Flexibility  
413 Among Packages for Zero-inflated Generalized Linear Mixed Modeling. *The R Journal*  
414 **9**:378-400.
- 415 Brooks-Pollock, E., G. O. Roberts, and M. J. Keeling. 2014. A dynamic model of bovine  
416 tuberculosis spread and control in Great Britain. *Nature* **511**:228-231.
- 417 Campbell, L. J., D. P. Walsh, D. S. Blehert, and J. M. Lorch. 2019. Long-term survival of  
418 *Pseudogymnoascus destructans* at elevated temperatures. *Journal of Wildlife Diseases*.

- 419 Chase-Topping, M., D. Gally, C. Low, L. Matthews, and M. Woolhouse. 2008. Super-shedding  
420 and the link between human infection and livestock carriage of *Escherichia coli* O157.  
421 *Nat Rev Microbiol* **6**:904-912.
- 422 Daszak, P., A. A. Cunningham, and A. D. Hyatt. 2000. Emerging infectious diseases of wildlife -  
423 threats to biodiversity and human health. *Science* **287**:443.
- 424 de Castro, F., and B. Bolker. 2005. Mechanisms of disease-induced extinction. *Ecology Letters*  
425 **8**:117-126.
- 426 Direnzo, G. V., P. F. Langhammer, K. R. Zamudio, and K. R. Lips. 2014. Fungal infection  
427 intensity and zoospore output of *Atelopus zeteki*, a potential acute chytrid supershedder.  
428 *PLoS One* **9**:e93356.
- 429 Esteban, J. I., B. Oporto, G. Aduriz, R. A. Juste, and A. Hurtado. 2009. Faecal shedding and  
430 strain diversity of *Listeria monocytogenes* in healthy ruminants and swine in Northern  
431 Spain. *BMC Vet Res* **5**:2.
- 432 Fisher, M. C., D. A. Henk, C. J. Briggs, J. S. Brownstein, L. C. Madoff, S. L. McCraw, and S. J.  
433 Gurr. 2012. Emerging fungal threats to animal, plant and ecosystem health. *Nature*  
434 **484**:186-194.
- 435 Frick, W. F., S. J. Puechmaille, J. R. Hoyt, B. A. Nickel, K. E. Langwig, J. T. Foster, K. E.  
436 Barlow, T. Bartonicka, D. Feller, A. J. Haarsma, C. Herzog, I. Horacek, J. van der Kooij,  
437 B. Mulkens, B. Petrov, R. Reynolds, L. Rodrigues, C. W. Stihler, G. G. Turner, and A.  
438 M. Kilpatrick. 2015. Disease alters macroecological patterns of North American bats.  
439 *Global Ecology and Biogeography* **24**:741-749.

- 440 Gervasi, S. S., J. Urbina, J. Hua, T. Chestnut, R. A. Relyea, and A. R. Blaustein. 2013.  
441 Experimental evidence for American bullfrog (*Lithobates catesbeianus*) susceptibility to  
442 chytrid fungus (*Batrachochytrium dendrobatidis*). *Ecohealth* **10**:166-171.
- 443 Godfrey, S. S. 2013. Networks and the ecology of parasite transmission: A framework for  
444 wildlife parasitology. *Int J Parasitol Parasites Wildl* **2**:235-245.
- 445 Henaux, V., and M. D. Samuel. 2011. Avian influenza shedding patterns in waterfowl:  
446 implications for surveillance, environmental transmission, and disease spread. *J Wildl*  
447 *Dis* **47**:566-578.
- 448 Hicks, A. C., S. Darling, J. Flewelling, R. von Linden, C. U. Meteyer, D. Redell, J. P. White, J.  
449 Redell, R. Smith, D. Blehert, N. Rayman, J. R. Hoyt, J. C. Okoniewski, and K. E.  
450 Langwig. 2021. Environmental transmission of *Pseudogymnoascus destructans* to  
451 hibernating little brown bats.  *biorxiv*.
- 452 Hopkins, S. R., J. R. Hoyt, J. P. White, H. M. Kaarakka, J. A. Redell, J. E. DePue, W. H.  
453 Scullon, A. M. Kilpatrick, and K. E. Langwig. 2021. Continued preference for  
454 suboptimal habitat reduces bat survival with white-nose syndrome. *Nat Commun* **12**:166.
- 455 Hoyt, J. R., A. M. Kilpatrick, and K. E. Langwig. 2021. Ecology and impacts of white-nose  
456 syndrome on bats. *Nature Reviews Microbiology*:1-15.
- 457 Hoyt, J. R., K. E. Langwig, J. Okoniewski, W. F. Frick, W. B. Stone, and A. M. Kilpatrick.  
458 2015. Long-term persistence of *Pseudogymnoascus destructans*, the causative agent of  
459 white-nose syndrome, in the absence of bats. *EcoHealth* **12**:330-333.
- 460 Hoyt, J. R., K. E. Langwig, K. Sun, G. Lu, K. L. Parise, T. Jiang, W. F. Frick, J. T. Foster, J.  
461 Feng, and A. M. Kilpatrick. 2016. Host persistence or extinction from emerging

462 infectious disease: insights from white-nose syndrome in endemic and invading regions.  
463 Proceedings of the Royal Society B: Biological Sciences **283**.

464 Hoyt, J. R., K. E. Langwig, K. Sun, K. L. Parise, A. Li, Y. Wang, X. Huang, L. Worledge, H.  
465 Miller, J. P. White, H. M. Kaarakka, J. A. Redell, T. Görföl, S. A. Boldogh, D. Fukui, M.  
466 Sakuyama, S. Yachimori, A. Sato, M. Dalannast, A. Jargalsaikhan, N. Batbayar, Y.  
467 Yovel, E. Amichai, I. Natradze, W. F. Frick, J. T. Foster, J. Feng, and A. M. Kilpatrick.  
468 2020. Environmental reservoir dynamics predict global infection patterns and population  
469 impacts for the fungal disease white-nose syndrome. Proceedings of the National  
470 Academy of Sciences:201914794.

471 Hoyt, J. R., K. E. Langwig, J. P. White, H. M. Kaarakka, J. A. Redell, A. Kurta, J. E. DePue, W.  
472 H. Scullon, K. L. Parise, and J. T. Foster. 2018. Cryptic connections illuminate pathogen  
473 transmission within community networks. Nature:1.

474 Hoyt, J. R., K. L. Parise, J. E. DePue, H. M. Kaarakka, J. A. Redell, W. H. Scullon, R. O'Reskie,  
475 J. T. Foster, A. M. Kilpatrick, K. E. Langwig, and J. P. White. 2023. Reducing  
476 environmentally mediated transmission to moderate impacts of an emerging wildlife  
477 disease. Journal of Applied Ecology **00**:1-11.

478 Islam, M. S., M. H. Zaman, M. S. Islam, N. Ahmed, and J. D. Clemens. 2020. Environmental  
479 reservoirs of *Vibrio cholerae*. Vaccine **38 Suppl 1**:A52-A62.

480 Jones, K. E., N. G. Patel, M. A. Levy, A. Storeygard, D. Balk, J. L. Gittleman, and P. Daszak.  
481 2008. Global trends in emerging infectious diseases. Nature **451**:990-U994.

482 Kailing, M. J., J. R. Hoyt, J. P. White, H. M. Kaarakka, J. A. Redell, A. E. Leon, T. E. Rocke, J.  
483 E. DePue, W. H. Scullon, K. L. Parise, J. T. Foster, A. M. Kilpatrick, and K. E. Langwig.

484           2023. Sex-biased infections scale to population impacts for an emerging wildlife disease.  
485           Proc Biol Sci **290**:20230040.

486 Kilonzo, C., X. Li, E. J. Vivas, M. T. Jay-Russell, K. L. Fernandez, and E. R. Atwill. 2013. Fecal  
487           shedding of zoonotic food-borne pathogens by wild rodents in a major agricultural region  
488           of the central California coast. *Appl Environ Microbiol* **79**:6337-6344.

489 Kilpatrick, A. M., P. Daszak, M. J. Jones, P. P. Marra, and L. D. Kramer. 2006. Host  
490           heterogeneity dominates West Nile virus transmission. *Proceedings of the Royal Society*  
491           B-Biological Sciences **273**:2327-2333.

492 Laggan, N. A., K. L. Parise, J. P. White, H. M. Kaarakka, J. A. Redell, J. E. DePue, W. H.  
493           Scullon, J. Kath, J. T. Foster, A. M. Kilpatrick, K. E. Langwig, and J. R. Hoyt. 2023.  
494           Data for: Host infection dynamics and disease induced mortality modify species  
495           contributions to the environmental reservoir. DRYAD.

496 Langwig, K. E., W. F. Frick, J. T. Bried, A. C. Hicks, T. H. Kunz, and A. M. Kilpatrick. 2012.  
497           Sociality, density-dependence and microclimates determine the persistence of  
498           populations suffering from a novel fungal disease, white-nose syndrome. *Ecol Lett* **15**.

499 Langwig, K. E., W. F. Frick, J. R. Hoyt, K. L. Parise, K. P. Drees, T. H. Kunz, J. T. Foster, and  
500           A. M. Kilpatrick. 2016. Drivers of variation in species impacts for a multi-host fungal  
501           disease of bats. *Philosophical Transactions of the Royal Society B: Biological Sciences*  
502           **10.1098/rstb.2015.0456**.

503 Langwig, K. E., W. F. Frick, R. Reynolds, K. L. Parise, K. P. Drees, J. R. Hoyt, T. L. Cheng, T.  
504           H. Kunz, J. T. Foster, and A. M. Kilpatrick. 2015a. Host and pathogen ecology drive the  
505           seasonal dynamics of a fungal disease, white-nose syndrome. *Proceedings of the Royal*  
506           *Society B: Biological Sciences* **282**:20142335.

- 507 Langwig, K. E., J. R. Hoyt, K. L. Parise, W. F. Frick, J. T. Foster, and A. M. Kilpatrick. 2017.  
508 Resistance in persisting bat populations after white-nose syndrome invasion.  
509 Philosophical Transactions of the Royal Society B: Biological Sciences **372**:20160044.
- 510 Langwig, K. E., J. R. Hoyt, K. L. Parise, J. Kath, D. Kirk, W. F. Frick, J. T. Foster, and A. M.  
511 Kilpatrick. 2015b. Invasion Dynamics of White-Nose Syndrome Fungus, Midwestern  
512 United States, 2012-2014. Emerging Infectious Disease **21**:1023-1026.
- 513 Langwig, K. E., J. P. White, K. L. Parise, H. M. Kaarakka, J. A. Redell, J. E. DePue, W. H.  
514 Scullon, J. T. Foster, A. M. Kilpatrick, and J. R. Hoyt. 2021. Mobility and infectiousness  
515 in the spatial spread of an emerging fungal pathogen. J Anim Ecol **90**:1134-1141.
- 516 Lawley, T. D., D. M. Bouley, Y. E. Hoy, C. Gerke, D. A. Relman, and D. M. Monack. 2008.  
517 Host transmission of Salmonella enterica serovar Typhimurium is controlled by virulence  
518 factors and indigenous intestinal microbiota. Infect Immun **76**:403-416.
- 519 Lenth, R. V. 2022. emmeans: Estimated Marginal Means, aka Least-Squares Means.
- 520 Lloyd-Smith, J. O., S. J. Schreiber, P. E. Kopp, and W. M. Getz. 2005. Superspreading and the  
521 effect of individual variation on disease emergence. Nature **438**:355-359.
- 522 Lockwood, J. L., P. Cassey, and T. Blackburn. 2005. The role of propagule pressure in  
523 explaining species invasions. Trends Ecol Evol **20**:223-228.
- 524 Lorch, J. M., C. U. Meteyer, M. J. Behr, J. G. Boyles, P. M. Cryan, A. C. Hicks, A. E. Ballmann,  
525 J. T. H. Coleman, D. N. Redell, D. M. Reeder, and D. S. Blehert. 2011. Experimental  
526 infection of bats with *Geomyces destructans* causes white-nose syndrome. Nature  
527 **480**:376-378.
- 528 Lorch, J. M., L. K. Muller, R. E. Russell, M. O'Connor, D. L. Lindner, and D. S. Blehert. 2013.  
529 Distribution and environmental persistence of the causative agent of white-nose



530 syndrome, *Geomyces destructans*, in bat hibernacula of the eastern United States.  
531 *Applied and Environmental Microbiology* **79**:1293-1301.

532 Maguire, C., G. V. DiRenzo, T. S. Tunstall, C. R. Muletz-Wolz, K. R. Zamudio, and K. R. Lips.  
533 2016. Dead or alive? Viability of chytrid zoospores shed from live amphibian hosts.  
534 *Diseases of Aquatic Organisms* **199**:179-187.

535 Matthews, L., J. C. Low, D. L. Gally, M. C. Pearce, D. J. Mellor, J. A. Heesterbeek, M. Chase-  
536 Topping, S. W. Naylor, D. J. Shaw, S. W. Reid, G. J. Gunn, and M. E. Woolhouse. 2006.  
537 Heterogeneous shedding of *Escherichia coli* O157 in cattle and its implications for  
538 control. *Proc Natl Acad Sci U S A* **103**:547-552.

539 McGuire, L. P., H. W. Mayberry, and C. K. Willis. 2017. White-nose syndrome increases torpid  
540 metabolic rate and evaporative water loss in hibernating bats. *American Journal of*  
541 *Physiology-Regulatory, Integrative and Comparative Physiology* **313**:R680-R686.

542 Mitchell, K. M., T. S. Churcher, T. W. Garner, and M. C. Fisher. 2008. Persistence of the  
543 emerging pathogen *Batrachochytrium dendrobatidis* outside the amphibian host greatly  
544 increases the probability of host extinction. *Proc Biol Sci* **275**:329-334.

545 Muller, L. K., J. M. Lorch, D. L. Lindner, M. O'Connor, A. Gargas, and D. S. Blehert. 2013. Bat  
546 white-nose syndrome: a real-time TaqMan polymerase chain reaction test targeting the  
547 intergenic spacer region of *Geomyces destructans*. *Mycologia* **105**:253-259.

548 Munywoki, P. K., D. C. Koech, C. N. Agoti, N. Kibirige, J. Kipkoech, P. A. Cane, G. F. Medley,  
549 and D. J. Nokes. 2015. Influence of age, severity of infection, and co-infection on the  
550 duration of respiratory syncytial virus (RSV) shedding. *Epidemiol Infect* **143**:804-812.

- 551 Paull, S. H., S. Song, K. M. McClure, L. C. Sackett, A. M. Kilpatrick, and P. T. J. Johnson.  
552 2012. From superspreaders to disease hotspots: linking transmission across hosts and  
553 space. *Frontiers in Ecology and the Environment* **10**:75-82.
- 554 Peterson, A. C., and V. J. McKenzie. 2014. Investigating differences across host species and  
555 scales to explain the distribution of the amphibian pathogen *Batrachochytrium*  
556 *dendrobatidis*. *PLoS One* **9**:e107441.
- 557 Plummer, I. H., C. J. Johnson, A. R. Chesney, J. A. Pedersen, and M. D. Samuel. 2018. Mineral  
558 licks as environmental reservoirs of chronic wasting disease prions. *PLoS One*  
559 **13**:e0196745.
- 560 Rushmore, J., D. Caillaud, L. Matamba, R. M. Stumpf, S. P. Borgatti, and S. Altizer. 2013.  
561 Social network analysis of wild chimpanzees provides insights for predicting infectious  
562 disease risk. *J Anim Ecol* **82**:976-986.
- 563 Scheele, B. C., D. A. Hunter, L. A. Brannelly, L. F. Skerratt, and D. A. Driscoll. 2017.  
564 Reservoir-host amplification of disease impact in an endangered amphibian. *Conserv*  
565 *Biol* **31**:592-600.
- 566 Searle, C. L., S. S. Gervasi, J. Hua, J. I. Hammond, R. A. Relyea, D. H. Olson, and A. R.  
567 Blaustein. 2011. Differential Host Susceptibility to *Batrachochytrium dendrobatidis*, an  
568 Emerging Amphibian Pathogen. *Conservation Biology* **25**:965-974.
- 569 Searle, S. R., F. M. Speed, and G. A. Miliken. 1980. Population Marginal Means in the Linear  
570 Model: An Alternative to Least Squares Means. *The American Statistician* **34**:216-221.
- 571 Sheth, P. M., A. Danesh, A. Sheung, A. Rebbapragada, K. Shahabi, C. Kovacs, R. Halpenny, D.  
572 Tilley, T. Mazzulli, K. MacDonald, D. Kelvin, and R. Kaul. 2006. Disproportionately

573 high semen shedding of HIV is associated with compartmentalized cytomegalovirus  
574 reactivation. *J Infect Dis* **193**:45-48.

575 Slater, N., R. M. Mitchell, R. H. Whitlock, T. Fyock, A. K. Pradhan, E. Knupfer, Y. H.  
576 Schukken, and Y. Louzoun. 2016. Impact of the shedding level on transmission of  
577 persistent infections in *Mycobacterium avium* subspecies paratuberculosis (MAP). *Vet*  
578 *Res* **47**:38.

579 Taylor, L. H., S. M. Latham, and M. E. Woolhouse. 2001. Risk factors for human disease  
580 emergence. *Philos Trans R Soc Lond B Biol Sci* **356**:983-989.

581 Turner, W. C., K. L. Kausrud, W. Beyer, W. R. Easterday, Z. R. Barandongo, E. Blaschke, C. C.  
582 Cloete, J. Lazak, M. N. Van Ert, and H. H. Ganz. 2016. Lethal exposure: An integrated  
583 approach to pathogen transmission via environmental reservoirs. *Scientific reports*  
584 **6**:27311.

585 VanderWaal, K. L., and V. O. Ezenwa. 2016. Heterogeneity in pathogen transmission:  
586 mechanisms and methodology. *Funct. Ecol.* **30**:1606-1622.

587 Verant, M. L., M. U. Carol, J. R. Speakman, P. M. Cryan, J. M. Lorch, and D. S. Blehert. 2014.  
588 White-nose syndrome initiates a cascade of physiologic disturbances in the hibernating  
589 bat host. *BMC physiology* **14**:10.

590 Warnecke, L., J. M. Turner, T. K. Bollinger, J. M. Lorch, V. Misra, P. M. Cryan, G. Wibbelt, D.  
591 S. Blehert, and C. K. R. Willis. 2012. Inoculation of bats with European *Geomyces*  
592 *destructans* supports the novel pathogen hypothesis for the origin of white-nose  
593 syndrome. *Proceedings of the National Academy of Sciences of the United States of*  
594 *America* **109**:6999-7003.

595 Warnecke, L., J. M. Turner, T. K. Bollinger, V. Misra, P. M. Cryan, D. S. Blehert, G. Wibbelt,  
596 and C. K. R. Willis. 2013. Pathophysiology of white-nose syndrome in bats: a  
597 mechanistic model linking wing damage to mortality. *Biology Letters* **9**.

598

599

600

601

602

603

604

605

606

607

608

609

610

611

612

613

614

615

616

617

618 **Figure captions:**

619 **Figure 1: Differences in pathogen shedding into the environment among invading and**  
620 **established invasion stages.**  $\log_{10}$  *P. destructans* environmental loads (ng DNA) among species  
621 during pathogen invasion (a) and establishment (b) in late hibernation. Each point represents the  
622  $\log_{10}$  environmental *P. destructans* loads from under an individual bat. Black points represent the  
623 estimated mean and bars indicate  $\pm$  standard error for each species. Samples collected that were  
624 beyond the limits of detection were set to  $10^{-5.75}$   $\log_{10}$  *P. destructans* loads (ng DNA).

625

626 **Figure 2: Bat infection prevalence, intensity, and the relationship between host infection**  
627 **and pathogen shedding.** For all panels, bat species are displayed by color. Black points indicate  
628 mean bat fungal loads by species and bars represent  $\pm$  standard error. (a) Pathogen prevalence for  
629 each species during pathogen invasion in late hibernation. (b) Bat  $\log_{10}$  *P. destructans* loads (ng  
630 DNA) for each species during pathogen invasion in late hibernation. (c) The relationship  
631 between  $\log_{10}$  *P. destructans* loads (ng DNA) on an individual bat and the amount of  $\log_{10}$  *P.*  
632 *destructans* (ng DNA) in the environment directly underneath individuals during pathogen  
633 invasion and establishment in late hibernation. Colored lines show the relationship between  $\log_{10}$   
634 bat *P. destructans* loads and  $\log_{10}$  environmental *P. destructans* loads fit with a linear mixed  
635 effects model. The gray solid line shows the 1:1 line, and points along this line would indicate  
636 that the amount of *P. destructans* on bats was equivalent to the amount shed into the  
637 environment. Each individual bat is represented by a point. Samples collected that were beyond  
638 the limits of detection were set to  $10^{-5.75}$   $\log_{10}$  *P. destructans* loads (ng DNA).

639

640 **Figure 3. Changes in host abundance between invading and established years.** Species  
641 within the community are differentiated by color and points represent a species population at an  
642 individual site. Species population abundance in the invasion (light gray box) and established  
643 years (dark gray box) in late hibernation within each site. Circular points indicate the mean  
644 abundance for each year and bars denote  $\pm$  standard error. For best data visualization, three data  
645 points have been excluded from the figure (1,110 *M. lucifugus* and 1,985 *P. subflavus* during the  
646 invading stage, and 3,154 *M. lucifugus* during the established stage).

647

648 **Figure 4. Differences in propagule pressure among species during invading and established**  
649 **stages and the relationship between propagule pressure and environmental contamination.**

650 (a-b) Propagule pressure (# of pathogen particles) by species during late hibernation in (a)  
651 invading and (b) established stages. Colored points represent populations of species within a site,  
652 black points represent the mean and bars indicate  $\pm$  standard error for each species. Point size is  
653 weighted by species population abundance. (c) Relationship between  $\log_{10}$  propagule pressure  
654 and  $\log_{10}$  mean site-level contamination. Site-level contamination was assessed in samples  $> 2\text{m}$   
655 away from roosting bats within sites during late hibernation in the established stage. Points  
656 indicate the sum propagule pressure at a site for each year and shape denotes invasion stage. The  
657 line shows the relationship between  $\log_{10}$  propagule pressure and  $\log_{10}$  environmental *P.*  
658 *destructans* loads fit with a linear mixed effects model. The total environmental contamination  
659 increased as propagule pressure increased within a site (Environmental contamination: intercept  
660 =  $-5.48 \pm 0.14$ , slope = 0.12, relationship between environmental contamination and propagule  
661 pressure  $P = 0.002$ ).

662 **Figure 1**

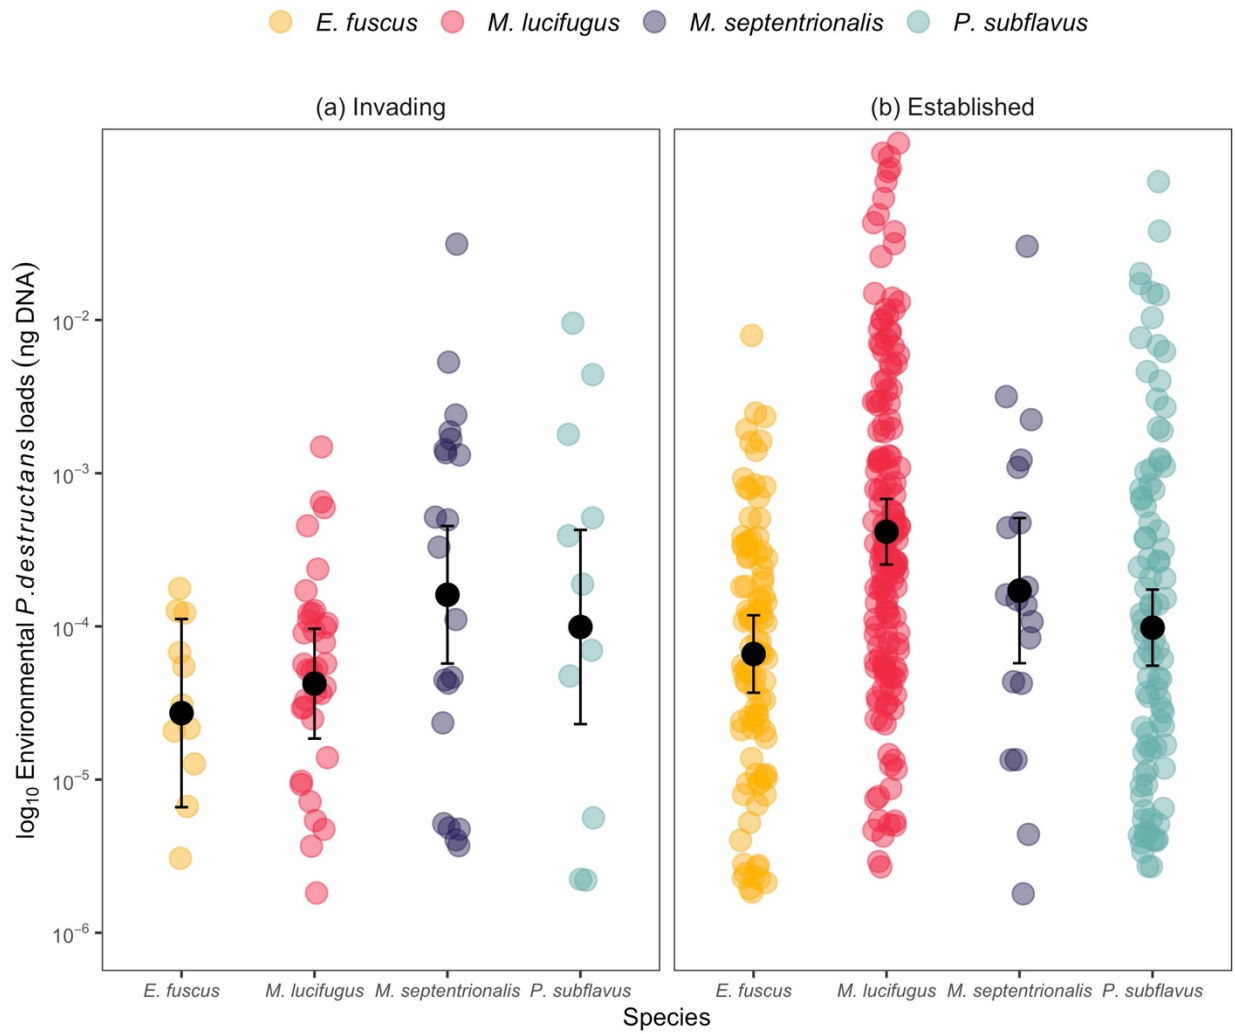

663

664 **Figure 2**

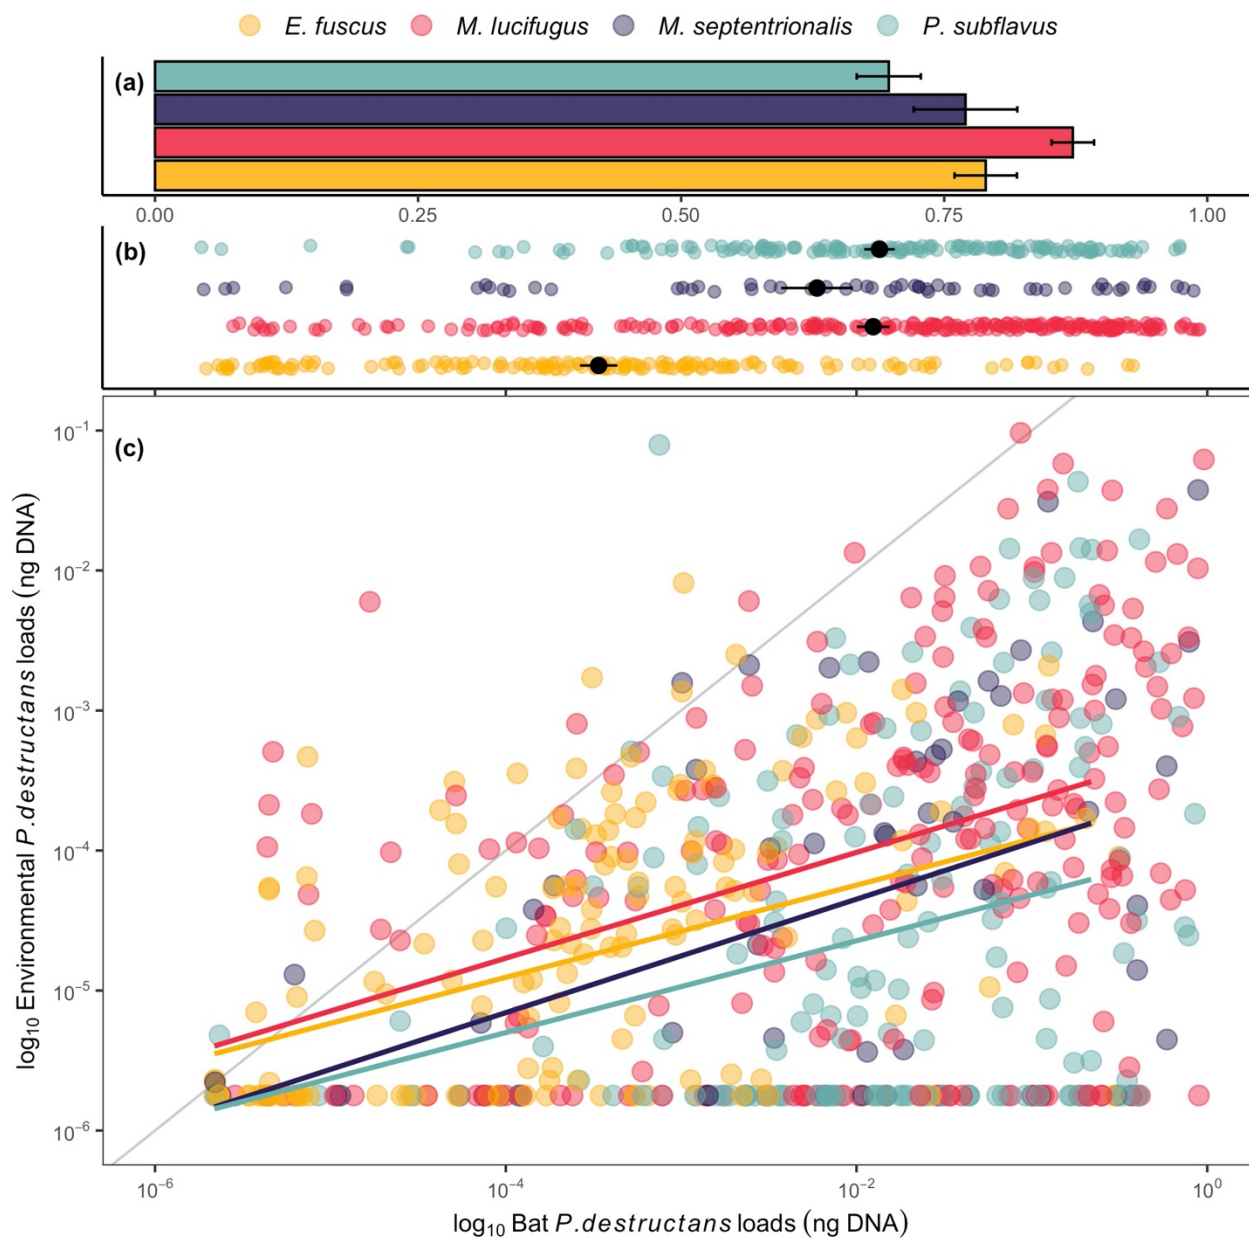

665



666 **Figure 3**

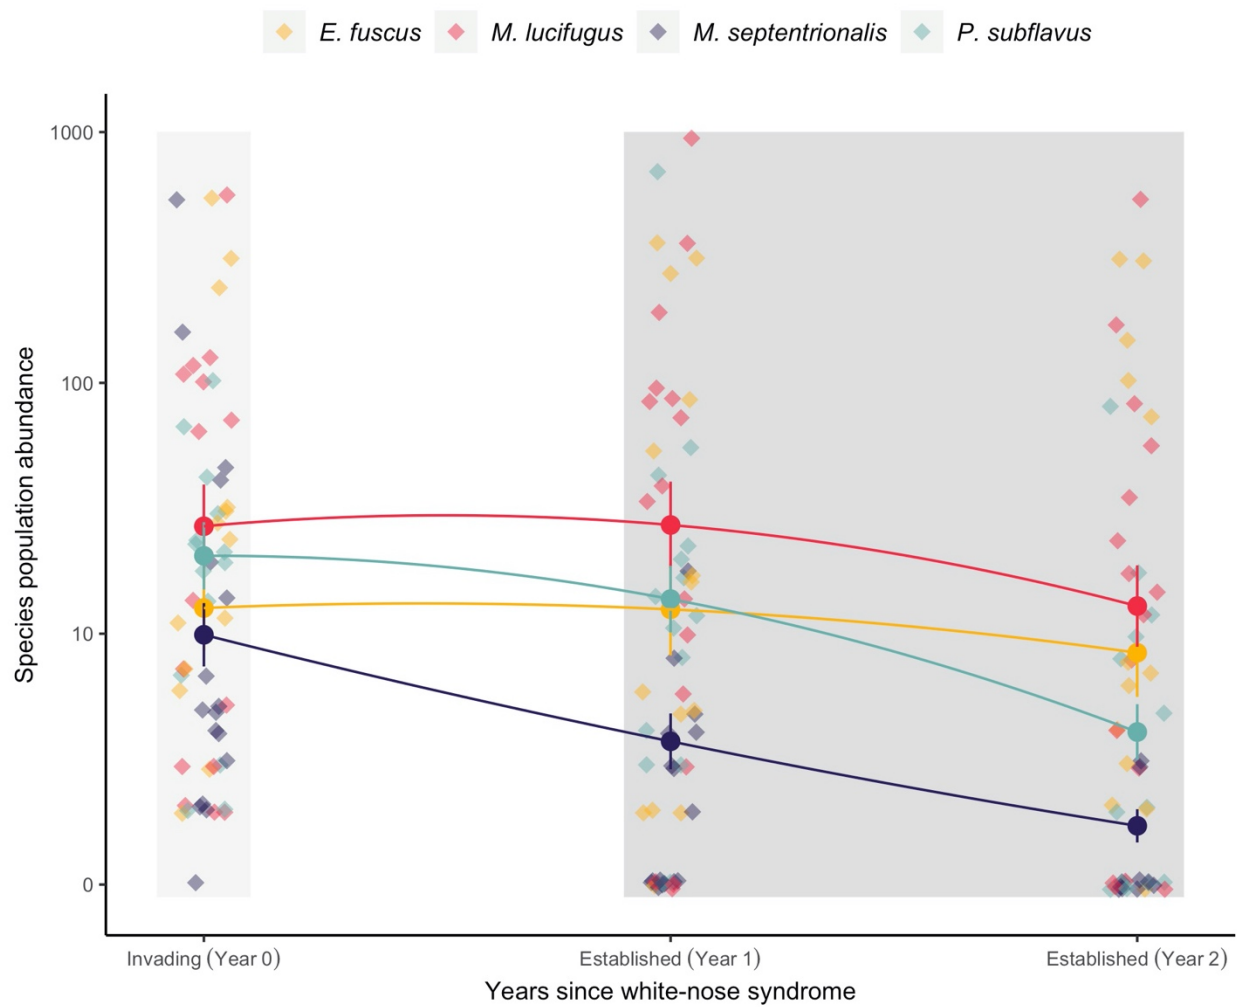

667

668 **Figure 4**

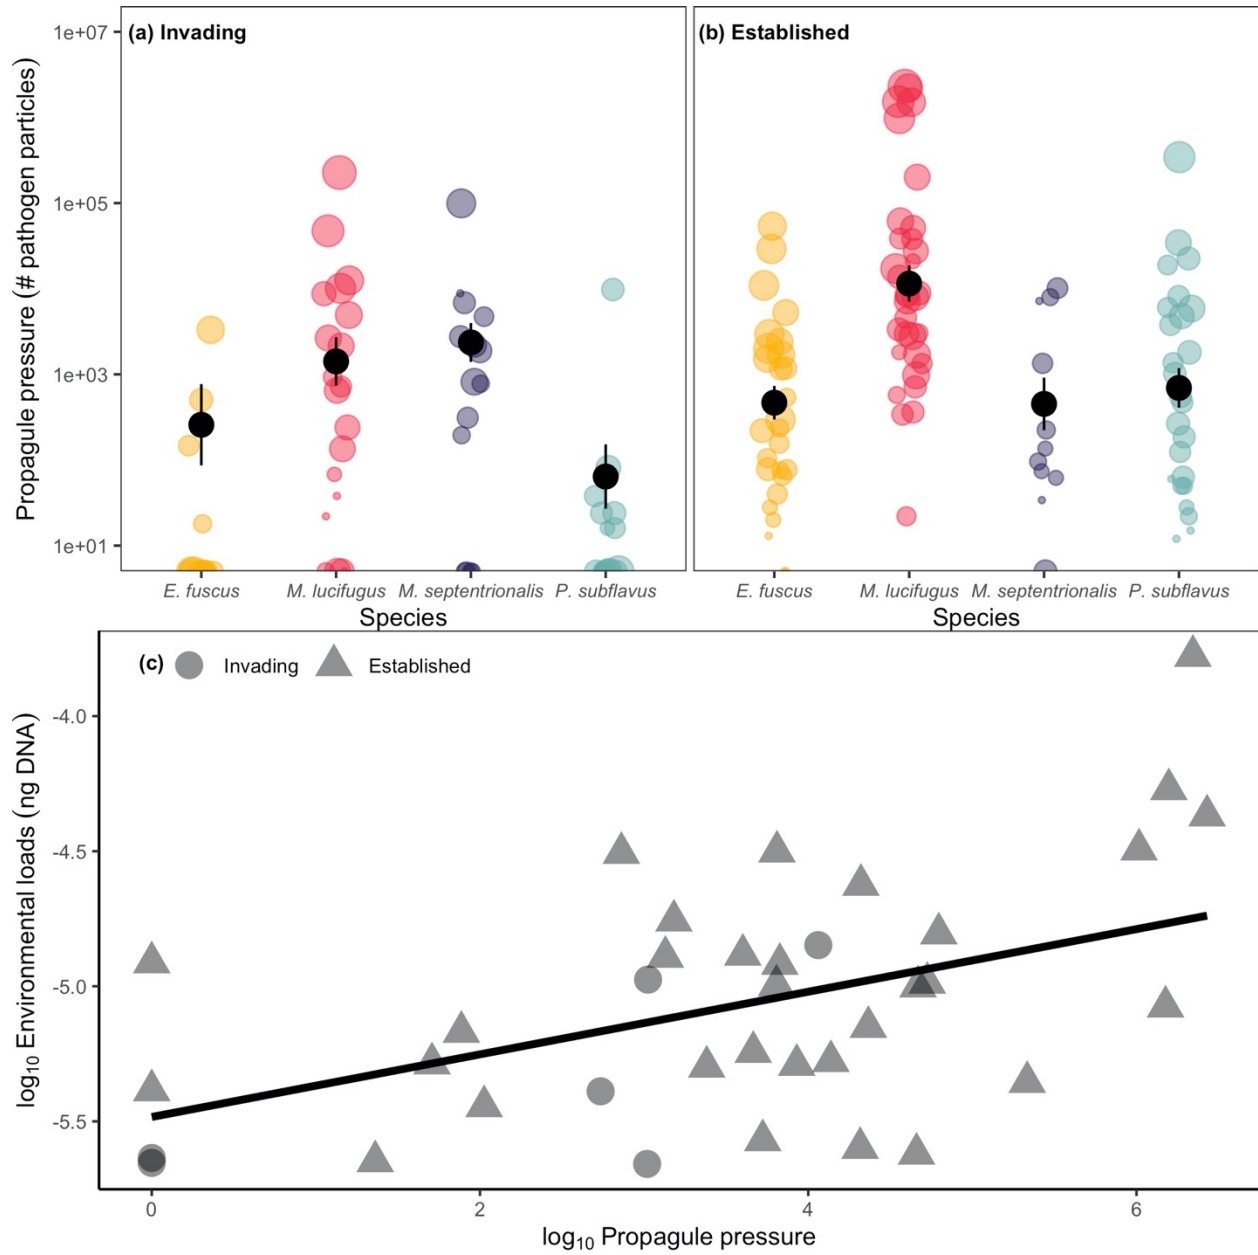

669
